# Supplementary material
Source: PubMed Central journal article supplement (PMC1100767)

**a**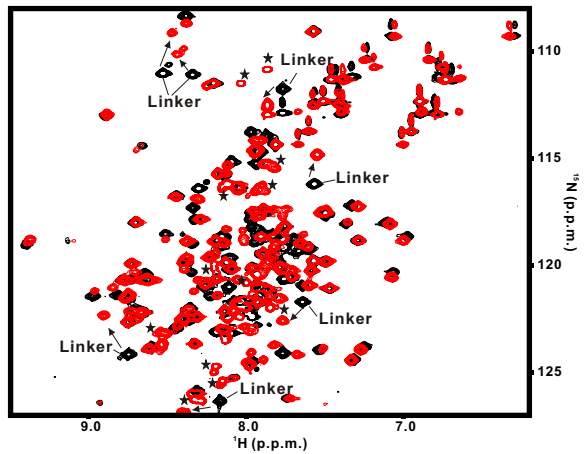**b**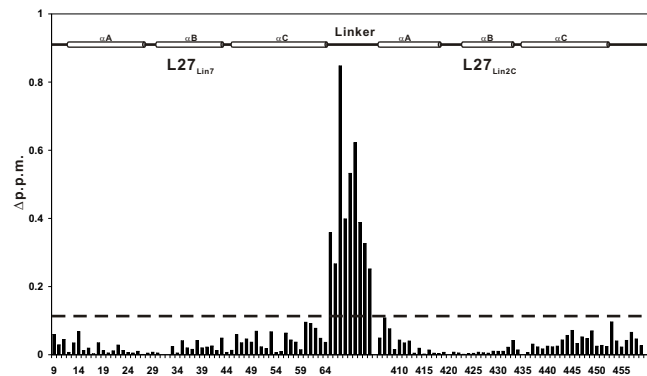**c**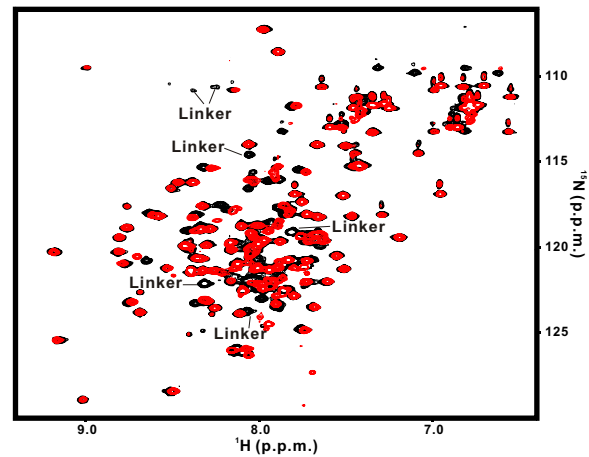**d**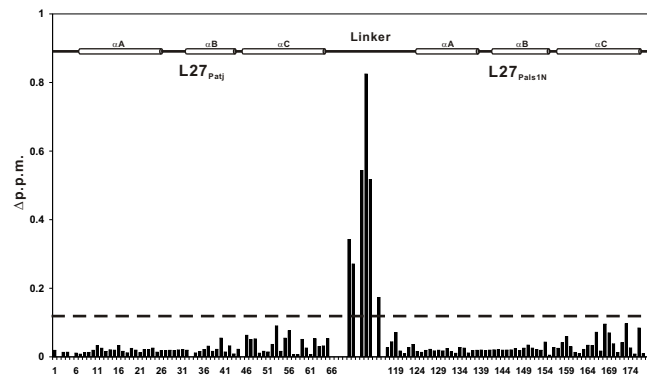

Supplement: pnas_102_19_6861__1.pdf [file pnas_102_19_6861__1.pdf]

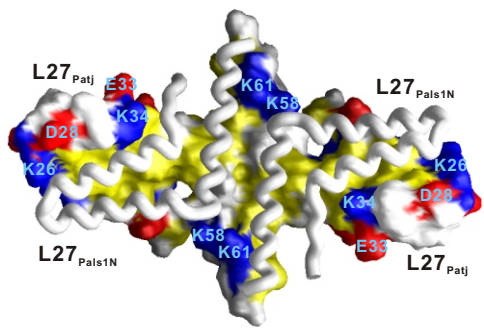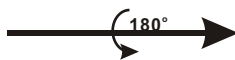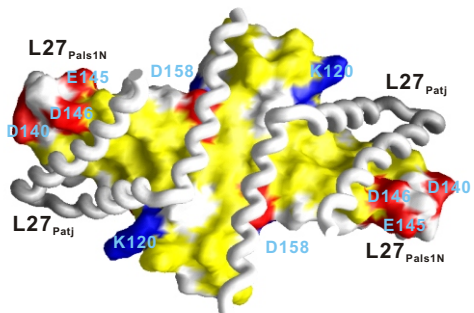

Supplement: pnas_102_19_6861__3.pdf [file pnas_102_19_6861__3.pdf]

**a**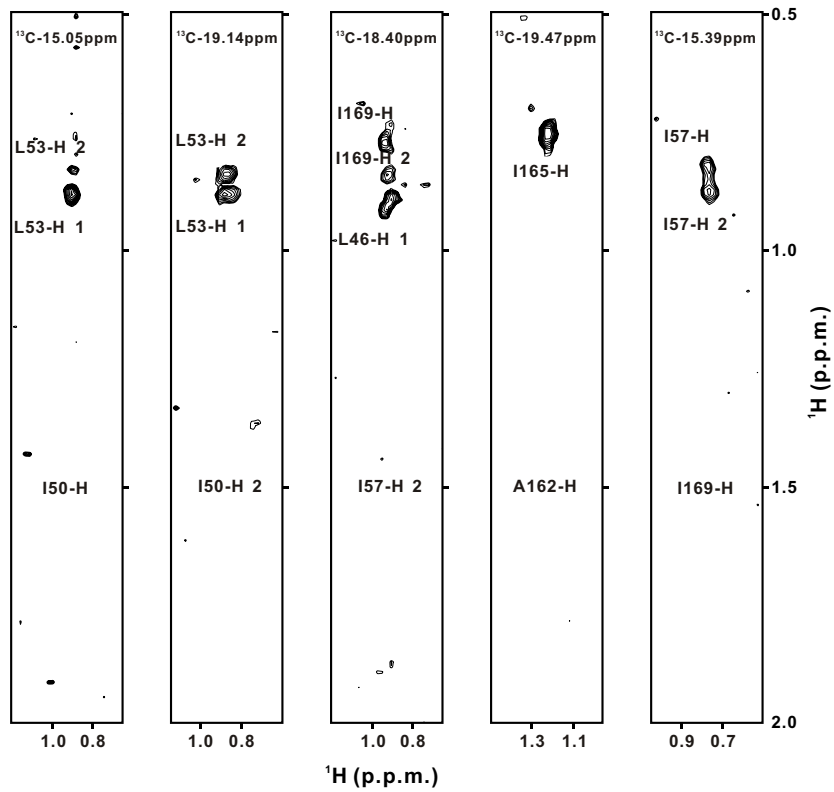**b**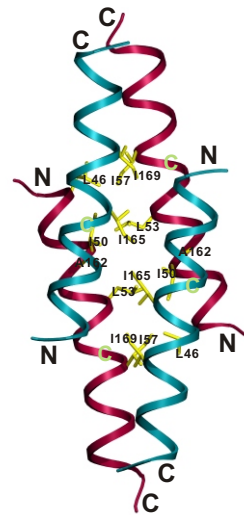**c**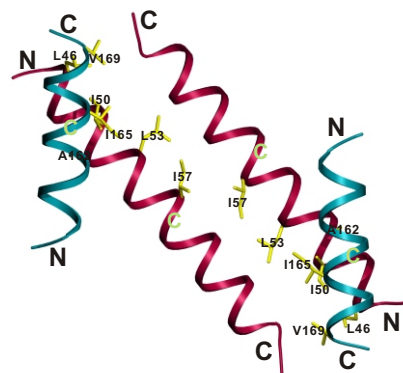

Supplement: pnas_102_19_6861__4.pdf [file pnas_102_19_6861__4.pdf]

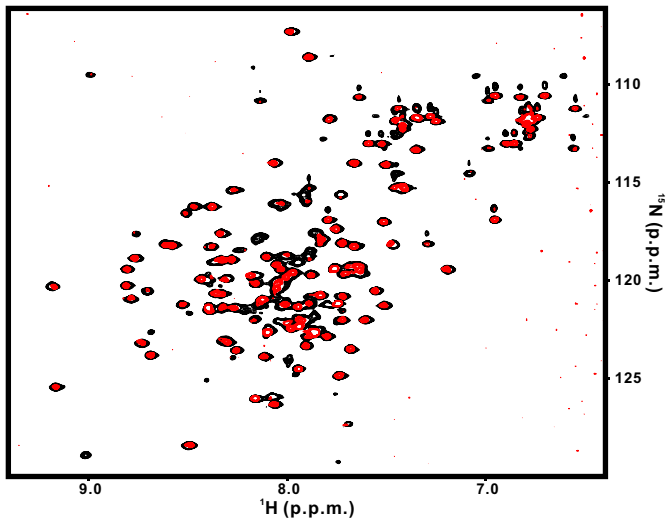

Supplement: pnas_102_19_6861__5.pdf [file pnas_102_19_6861__5.pdf]

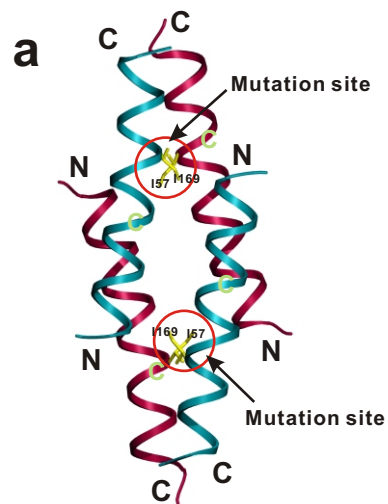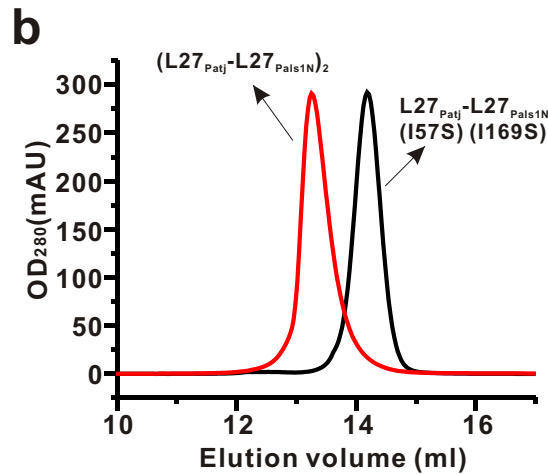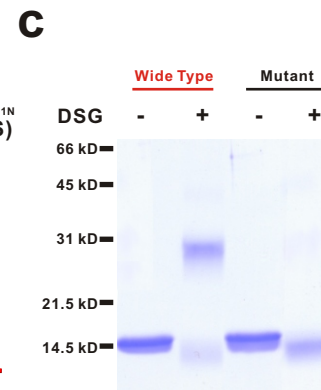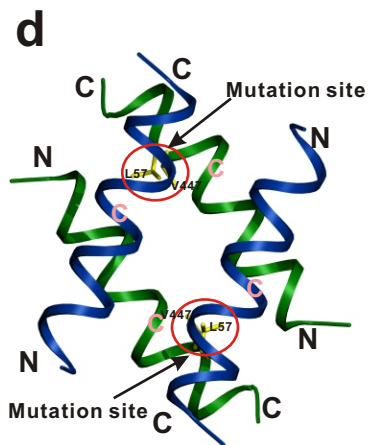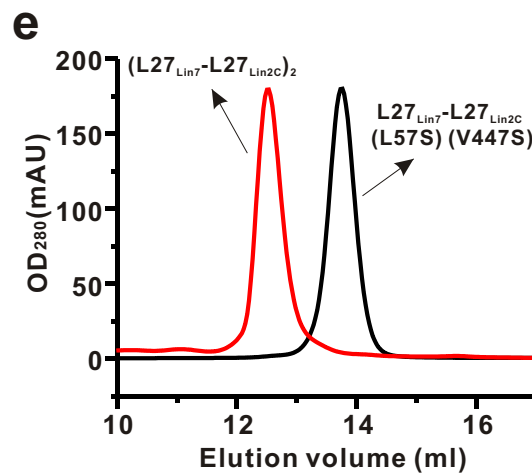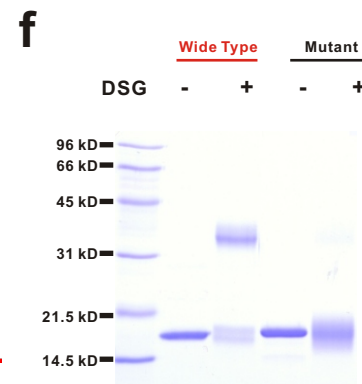

Supplement: pnas_102_19_6861__6.pdf [file pnas_102_19_6861__6.pdf]
